# Supplementary material for: Materials design, synthesis, and transport properties of disordered rare-earth Zintl bismuthides with the anti-Th3P4 structure type
Source: Royal Society of Chemistry journal article supplement (doi:10.1039/d2dt00412g), 2022-01-01
Supplement: d2dt00412g1.pdf [file d2dt00412g1.pdf]

# Materials design, synthesis, and transport properties of disordered rare-earth Zintl bismuthides with the *anti*-Th<sub>3</sub>P<sub>4</sub> structure type

*Michael O. Ogunbunmi, Sviatoslav Baranets, Svilen Bobev\**

Department of Chemistry and Biochemistry, University of Delaware, Newark, Delaware,  
19716, United States

\*Corresponding author Email: bobev@udel.edu

## Table of Contents

|                                                                                                                                                                                                                |        |
|----------------------------------------------------------------------------------------------------------------------------------------------------------------------------------------------------------------|--------|
| 1. Tables with Fractional Atomic Coordinates of $\text{Ca}_{4-x}\text{RE}_x\text{Bi}_3$ and $\text{Ca}_3\text{HoBi}_{1.5}\text{Sb}_{1.5}$ .....                                                                | S3-S15 |
| a. Table S1. Fractional Atomic Coordinates of $\text{Ca}_{3.33(1)}\text{Ce}_{0.67}\text{Bi}_3$ .....                                                                                                           | S3     |
| b. Table S2. Fractional Atomic Coordinates of $\text{Ca}_{3.35(1)}\text{Pr}_{0.66}\text{Bi}_3$ .....                                                                                                           | S4     |
| c. Table S3. Fractional Atomic Coordinates of $\text{Ca}_{3.33(1)}\text{Nd}_{0.67}\text{Bi}_3$ .....                                                                                                           | S5     |
| d. Table S4. Fractional Atomic Coordinates of $\text{Ca}_{3.23(1)}\text{Sm}_{0.77}\text{Bi}_3$ .....                                                                                                           | S6     |
| e. Table S5. Fractional Atomic Coordinates of $\text{Ca}_{3.23(1)}\text{Gd}_{0.77}\text{Bi}_3$ .....                                                                                                           | S7     |
| f. Table S6. Fractional Atomic Coordinates of $\text{Ca}_{3.35(1)}\text{Tb}_{0.65}\text{Bi}_3$ .....                                                                                                           | S8     |
| g. Table S7. Fractional Atomic Coordinates of $\text{Ca}_{3.33(1)}\text{Dy}_{0.67}\text{Bi}_3$ .....                                                                                                           | S9     |
| h. Table S8. Fractional Atomic Coordinates of $\text{Ca}_{3.38(1)}\text{Ho}_{0.62}\text{Bi}_3$ .....                                                                                                           | S10    |
| i. Table S9. Fractional Atomic Coordinates of $\text{Ca}_{3.27(1)}\text{Er}_{0.73}\text{Bi}_3$ .....                                                                                                           | S11    |
| j. Table S10. Fractional Atomic Coordinates of $\text{Ca}_{3.25(1)}\text{Tm}_{0.75}\text{Bi}_3$ .....                                                                                                          | S12    |
| k. Table S11. Fractional Atomic Coordinates of $\text{Ca}_{3.47(1)}\text{Lu}_{0.53}\text{Bi}_3$ .....                                                                                                          | S13    |
| l. Table S12. Fractional Atomic Coordinates of $\text{Ca}_{3.29(1)}\text{Y}_{0.71}\text{Bi}_3$ .....                                                                                                           | S14    |
| m. Table S13. Fractional Atomic Coordinates of $\text{Ca}_{3.2(1)}\text{Ho}_{0.8}\text{Bi}_{1.67(1)}\text{Sb}_{1.33}$ ..                                                                                       | S15    |
| 2. Table S2. Selected crystallographic data of $\text{Ca}_3\text{HoBi}_{1.5}\text{Sb}_{1.5}$ .....                                                                                                             | S16    |
| 3. Figure S1. Differential Scanning Calorimetry and Thermogravimetric Experiments of $\text{Ca}_3\text{REBi}_3$ ( $\text{RE} = \text{Ce}, \text{Pr}$ ) and $\text{Ca}_3\text{HoBi}_{1.5}\text{Sb}_{1.5}$ ..... | S17    |
| 4. Figure S2. Electronic structure of $\text{Ca}_4\text{Bi}_3$ .....                                                                                                                                           | S18    |
| 5. Figure S3. SEM image and EDX analysis of $\text{Ca}_3\text{SmBi}_3$ .....                                                                                                                                   | S19    |
| 6. Figure S4. SEM image and EDX analysis of $\text{Ca}_3\text{LaBi}_{1.5}\text{Sb}_{1.5}$ .....                                                                                                                | S20    |

**Table S1.** Fractional Atomic Coordinates and Equivalent Isotropic Displacement Parameters ( $\text{\AA}^2$ ) for  $\text{Ca}_{3.33(1)}\text{Ce}_{0.67}\text{Bi}_3$ .  $U_{eq}$  is defined as 1/3 of the trace of the orthogonalized  $U_{ij}$  tensor.

| Atom                 | Site | $x$        | $y$ | $z$ | $U_{eq}$  |
|----------------------|------|------------|-----|-----|-----------|
| Ca1/Ce1 <sup>a</sup> | 16c  | 0.07103(5) | $x$ | $x$ | 0.0113(4) |
| Sb1                  | 12a  | 3/8        | 0   | 1/4 | 0.0100(2) |

<sup>a</sup>Atomic occupancies according to refinement: Ca1/Ce1 = 0.822(7)Ca + 0.178Ce.

**Table S2.** Fractional Atomic Coordinates and Equivalent Isotropic Displacement Parameters ( $\text{\AA}^2$ ) for  $\text{Ca}_{3.35(1)}\text{Pr}_{0.66}\text{Bi}_3$ .  $U_{eq}$  is defined as 1/3 of the trace of the orthogonalized  $U_{ij}$  tensor.

| Atom                 | Site | $x$       | $y$ | $z$ | $U_{eq}$  |
|----------------------|------|-----------|-----|-----|-----------|
| Ca1/Pr1 <sup>a</sup> | 16c  | 0.0721(1) | $x$ | $x$ | 0.0067(9) |
| Bi1                  | 12a  | 3/8       | 0   | 1/4 | 0.0068(3) |

<sup>a</sup>Atomic occupancies according to refinement: Ca1/Pr1 = 0.836(8)Ca + 0.164Pr.

**Table S3.** Fractional Atomic Coordinates and Equivalent Isotropic Displacement Parameters ( $\text{\AA}^2$ ) for  $\text{Ca}_{3.33(1)}\text{Nd}_{0.67}\text{Bi}_3$ .  $U_{eq}$  is defined as 1/3 of the trace of the orthogonalized  $U_{ij}$  tensor.

| Atom                 | Site | $x$       | $y$ | $z$ | $U_{eq}$  |
|----------------------|------|-----------|-----|-----|-----------|
| Ca1/Nd1 <sup>a</sup> | 16c  | 0.0719(2) | $x$ | $x$ | 0.0084(8) |
| Bi1                  | 12a  | 3/8       | 0   | 1/4 | 0.0084(2) |

<sup>a</sup>Atomic occupancies according to refinement: Ca1/Nd1 = 0.833(6)Ca + 0.167Nd.

**Table S4.** Fractional Atomic Coordinates and Equivalent Isotropic Displacement Parameters ( $\text{\AA}^2$ ) for  $\text{Ca}_{3.23(1)}\text{Sm}_{0.77}\text{Bi}_3$ .  $U_{eq}$  is defined as 1/3 of the trace of the orthogonalized  $U_{ij}$  tensor.

| Atom                 | Site | $x$       | $y$ | $z$ | $U_{eq}$  |
|----------------------|------|-----------|-----|-----|-----------|
| Ca1/Sm1 <sup>a</sup> | 16c  | 0.0719(1) | $x$ | $x$ | 0.0087(7) |
| Bi1                  | 12a  | 3/8       | 0   | 1/4 | 0.0083(2) |

<sup>a</sup>Atomic occupancies according to refinement: Ca1/Sm1 = 0.807(6)Ca + 0.193Sm.

**Table S5.** Fractional Atomic Coordinates and Equivalent Isotropic Displacement Parameters ( $\text{\AA}^2$ ) for  $\text{Ca}_{3.23(1)}\text{Gd}_{0.77}\text{Bi}_3$ .  $U_{eq}$  is defined as 1/3 of the trace of the orthogonalized  $U_{ij}$  tensor.

| Atom                 | Site | $x$       | $y$ | $z$ | $U_{eq}$  |
|----------------------|------|-----------|-----|-----|-----------|
| Ca1/Gd1 <sup>a</sup> | 16c  | 0.0723(1) | $x$ | $x$ | 0.0073(7) |
| Bi1                  | 12a  | 3/8       | 0   | 1/4 | 0.0065(2) |

<sup>a</sup>Atomic occupancies according to refinement: Ca1/Gd1 = 0.808(7)Ca + 0.192Gd.

**Table S6.** Fractional Atomic Coordinates and Equivalent Isotropic Displacement Parameters ( $\text{\AA}^2$ ) for  $\text{Ca}_{3.35(1)}\text{Tb}_{0.65}\text{Bi}_3$ .  $U_{eq}$  is defined as 1/3 of the trace of the orthogonalized  $U_{ij}$  tensor.

| Atom                 | Site | $x$       | $y$ | $z$ | $U_{eq}$ |
|----------------------|------|-----------|-----|-----|----------|
| Ca1/Tb1 <sup>a</sup> | 16c  | 0.0725(1) | $x$ | $x$ | 0.011(1) |
| Bi1                  | 12a  | 3/8       | 0   | 1/4 | 0.010(1) |

<sup>a</sup>Atomic occupancies according to refinement: Ca1/Tb1 = 0.837(10)Ca + 0.163Tb.



**Table S7.** Fractional Atomic Coordinates and Equivalent Isotropic Displacement Parameters ( $\text{\AA}^2$ ) for  $\text{Ca}_{3.33(1)}\text{Dy}_{0.67}\text{Bi}_3$ .  $U_{eq}$  is defined as 1/3 of the trace of the orthogonalized  $U_{ij}$  tensor.

| Atom                 | Site | $x$       | $y$ | $z$ | $U_{eq}$  |
|----------------------|------|-----------|-----|-----|-----------|
| Ca1/Dy1 <sup>a</sup> | 16c  | 0.0724(1) | $x$ | $x$ | 0.0090(7) |
| Bi1                  | 12a  | 3/8       | 0   | 1/4 | 0.0096(2) |

<sup>a</sup>Atomic occupancies according to refinement: Ca1/Dy1 = 0.833(4)Ca + 0.167Dy

**Table S8.** Fractional Atomic Coordinates and Equivalent Isotropic Displacement Parameters ( $\text{\AA}^2$ ) for  $\text{Ca}_{3.38(1)}\text{Ho}_{0.62}\text{Bi}_3$ .  $U_{eq}$  is defined as 1/3 of the trace of the orthogonalized  $U_{ij}$  tensor.

| Atom                 | Site | $x$        | $y$ | $z$ | $U_{eq}$  |
|----------------------|------|------------|-----|-----|-----------|
| Ca1/Ho1 <sup>a</sup> | 16c  | 0.07252(9) | $x$ | $x$ | 0.0095(6) |
| Bi1                  | 12a  | 3/8        | 0   | 1/4 | 0.0097(2) |

<sup>a</sup>Atomic occupancies according to refinement: Ca1/Ho1 = 0.844(5)Ca + 0.156Ho.

**Table S9.** Fractional Atomic Coordinates and Equivalent Isotropic Displacement Parameters ( $\text{\AA}^2$ ) for  $\text{Ca}_{3.27(1)}\text{Er}_{0.73}\text{Bi}_3$ .  $U_{eq}$  is defined as 1/3 of the trace of the orthogonalized  $U_{ij}$  tensor.

| Atom                 | Site | $x$       | $y$ | $z$ | $U_{eq}$ |
|----------------------|------|-----------|-----|-----|----------|
| Ca1/Er1 <sup>a</sup> | 16c  | 0.0727(2) | $x$ | $x$ | 0.011(1) |
| Bi1                  | 12a  | 3/8       | 0   | 1/4 | 0.010(1) |

<sup>a</sup>Atomic occupancies according to refinement: Ca1/Er1 = 0.818(8)Ca + 0.182Er.

**Table S10.** Fractional Atomic Coordinates and Equivalent Isotropic Displacement Parameters ( $\text{\AA}^2$ ) for  $\text{Ca}_{3.25(1)}\text{Tm}_{0.75}\text{Bi}_3$ .  $U_{eq}$  is defined as 1/3 of the trace of the orthogonalized  $U_{ij}$  tensor.

| Atom                 | Site | $x$       | $y$ | $z$ | $U_{eq}$  |
|----------------------|------|-----------|-----|-----|-----------|
| Ca1/Tm1 <sup>a</sup> | 16c  | 0.0725(1) | $x$ | $x$ | 0.0091(9) |
| Bi1                  | 12a  | 3/8       | 0   | 1/4 | 0.0106(3) |

<sup>a</sup>Atomic occupancies according to refinement: Ca1/Tm1 = 0.813(7)Ca + 0.187Tm.

**Table S11.** Fractional Atomic Coordinates and Equivalent Isotropic Displacement Parameters ( $\text{\AA}^2$ ) for  $\text{Ca}_{3.47(1)}\text{Lu}_{0.5}\text{Bi}_3$ .  $U_{eq}$  is defined as 1/3 of the trace of the orthogonalized  $U_{ij}$  tensor.

| Atom                 | Site | $x$        | $y$ | $z$ | $U_{eq}$  |
|----------------------|------|------------|-----|-----|-----------|
| Ca1/Lu1 <sup>a</sup> | 16c  | 0.07235(9) | $x$ | $x$ | 0.0116(5) |
| Bi1                  | 12a  | 3/8        | 0   | 1/4 | 0.0151(3) |

<sup>a</sup>Atomic occupancies according to refinement: Ca1/Lu1 = 0.865(6)Ca + 0.135Lu.

**Table S12.** Fractional Atomic Coordinates and Equivalent Isotropic Displacement Parameters ( $\text{\AA}^2$ ) for  $\text{Ca}_{3.29(1)}\text{Y}_{0.71}\text{Bi}_3$ .  $U_{eq}$  is defined as 1/3 of the trace of the orthogonalized  $U_{ij}$  tensor.

| Atom                | Site | $x$       | $y$ | $z$ | $U_{eq}$  |
|---------------------|------|-----------|-----|-----|-----------|
| Ca1/Y1 <sup>a</sup> | 16c  | 0.0728(2) | $x$ | $x$ | 0.011(1)  |
| Bi1                 | 12a  | 3/8       | 0   | 1/4 | 0.0096(2) |

<sup>a</sup>Atomic occupancies according to refinement: Ca1/Y1 = 0.823(18)Ca + 0.177Y.

**Table S13.** Fractional Atomic Coordinates and Equivalent Isotropic Displacement Parameters ( $\text{\AA}^2$ ) for  $\text{Ca}_{3.2}\text{Ho}_{0.8}\text{Bi}_{1.67(1)}\text{Sb}_{1.33}$ .  $U_{eq}$  is defined as 1/3 of the trace of the orthogonalized  $U_{ij}$  tensor.

| Atom                 | Site | $x$        | $y$ | $z$ | $U_{eq}$ |
|----------------------|------|------------|-----|-----|----------|
| Ca1/Ho1 <sup>a</sup> | 16c  | 0.07250(2) | $x$ | $x$ | 0.009(1) |
| Bi1/Sb1 <sup>b</sup> | 12a  | 3/8        | 0   | 1/4 | 0.009(1) |

<sup>a</sup>Atomic occupancies of Ca and Ho were fixed according to the ratio  $\text{Ca}/\text{Ho} = 0.8\text{Ca} + 0.2\text{Ho}$ .

<sup>b</sup>Atomic occupancies according to refinement:  $\text{Bi1}/\text{Sb1} = 0.56(4)\text{Bi} + 0.44(4)\text{Sb}$ .

**Table S14.** Selected crystallographic data of  $\text{Ca}_3\text{HoBi}_{1.5}\text{Sb}_{1.5}$ , measured at 200(2) K, space group  $I\bar{4}3d$ ,  $Z = 4$ , Mo  $K\alpha$  radiation  $\lambda = 0.71073 \text{ \AA}$ .

| refined formula                      | $\text{Ca}_{3.2}\text{Ho}_{0.8}\text{Bi}_{1.67(1)}\text{Sb}_{1.33}$ |
|--------------------------------------|---------------------------------------------------------------------|
| formula wt.                          | 771.12                                                              |
| $a/\text{\AA}$                       | 9.4530(17)                                                          |
| $V/\text{\AA}^3$                     | 844.7(4)                                                            |
| $\rho_{\text{cal}}/\text{g cm}^{-3}$ | 6.06                                                                |
| $\mu/\text{cm}^{-1}$                 | 481.5                                                               |
| $R_1 (I \geq 2\sigma_I)^a$           | 0.0376                                                              |
| $wR_2 (I \geq 2\sigma_I)^a$          | 0.0768                                                              |
| $R_1$ (all data) <sup>a</sup>        | 0.0403                                                              |
| $wR_2$ (all data) <sup>a</sup>       | 0.0775                                                              |
| largest diff. peak and hole          | 2.69; -1.25                                                         |

<sup>a</sup>  $R_1 = \sum ||F_o| - |F_c|| / \sum |F_o|$ ;  $wR_2 = [\sum [w(F_o^2 - F_c^2)^2] / \sum [w(F_o^2)]]^{1/2}$ , where  $w = 1 / [\sigma^2 F_o^2 + (0.0236P)^2 + (83.284P)]$ , and  $P = (F_o^2 + 2F_c^2) / 3$ .



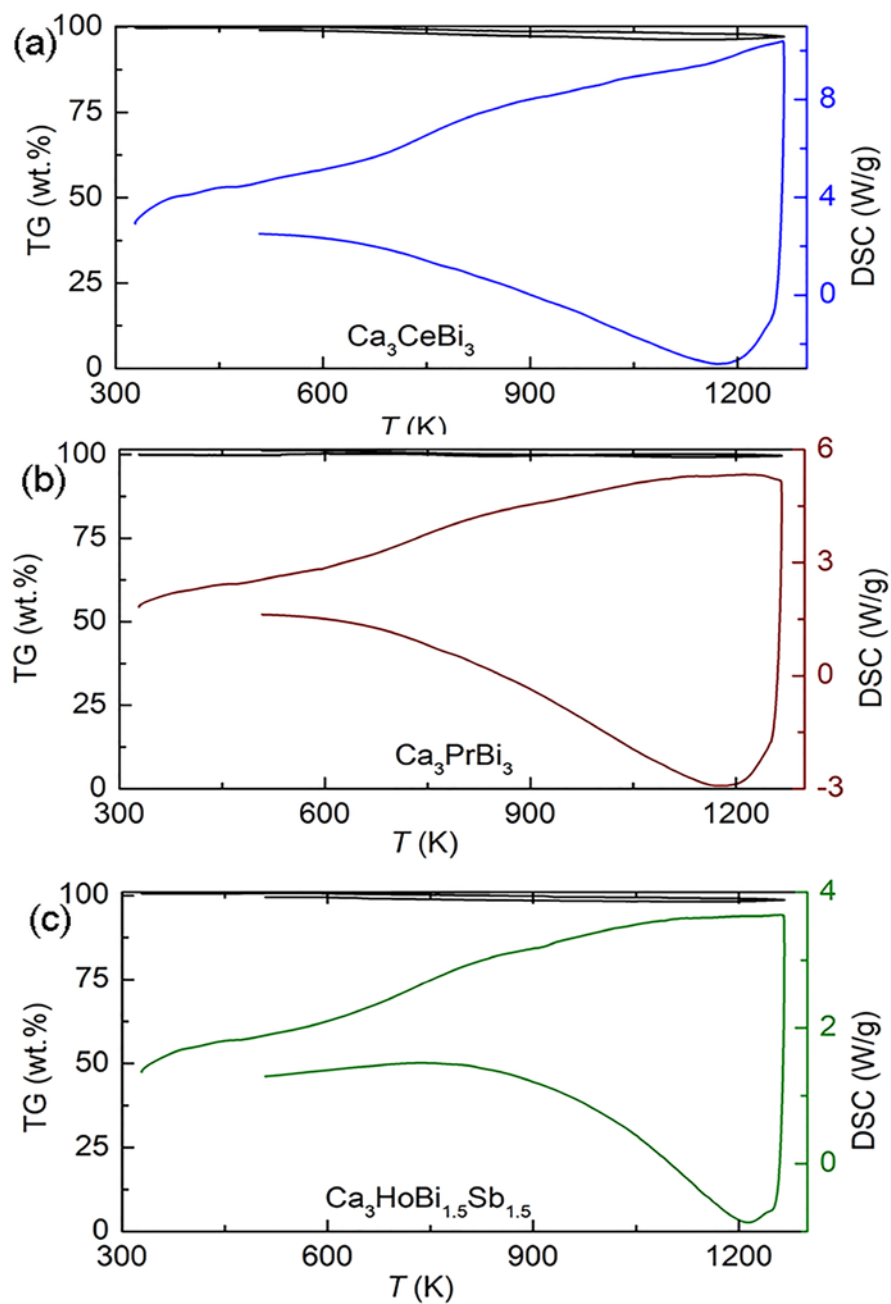

**Figure S1.** Plots of TG/DSC analysis for (a)  $\text{Ca}_3\text{LaBi}_3$  (b)  $\text{Ca}_3\text{PrBi}_3$  and (c)  $\text{Ca}_3\text{HoBi}_{1.5}\text{Sb}_{1.5}$  samples. The weight (wt.) % and heat flows are represented as blue, brown, and green lines, respectively.

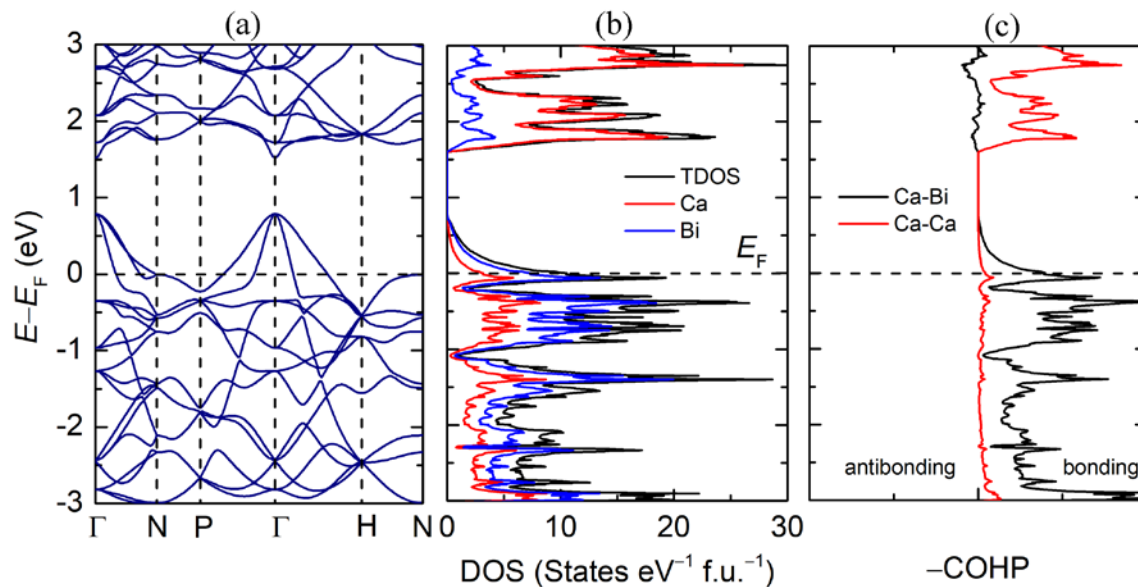

**Figure S2.** (a) Electronic band structure of  $\text{Ca}_4\text{Bi}_3$ . (b) Total density of states (TDOS) and orbital resolved DOS of  $\text{Ca}_4\text{Bi}_3$ . (c) calculated COHP curves for Ca–Bi and Ca–Ca interactions for  $\text{Ca}_4\text{Bi}_3$ . COHP are showing the bonding and antibonding states as indicated. The Fermi energy is set as a reference point at 0 eV.

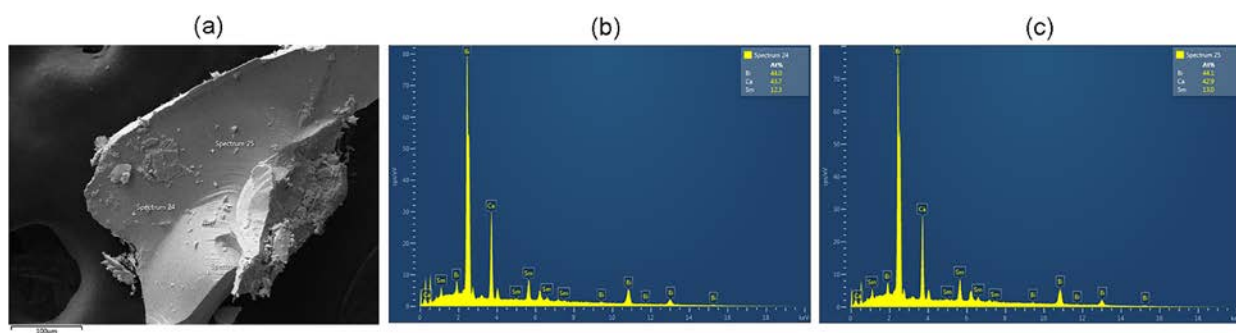

**Figure S3.** (a) SEM image of single crystal of  $\text{Ca}_3\text{SmBi}_3$ . (b) and (c) Representative histograms from EDS analysis of  $\text{Ca}_3\text{SmBi}_3$  under high magnification.

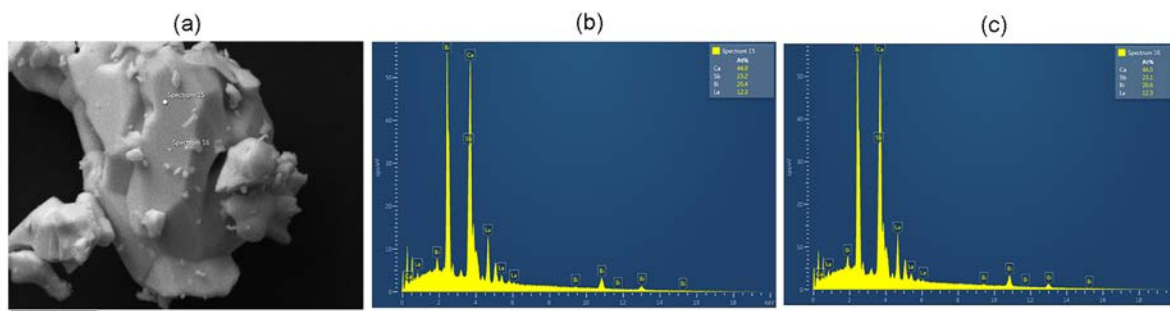

**Figure S4.** (a) SEM image of single crystal of  $\text{Ca}_3\text{LaBi}_{1.5}\text{Sb}_{1.5}$ . (b) and (c) Representative histograms from EDS analysis of  $\text{Ca}_3\text{SmBi}_3$  under high magnification.
